# Supplementary material for: Structural prediction and multilayer Li+ storage in two-dimensional VC2 carbide studied by first-principles calculations
Source: Royal Society of Chemistry journal article supplement (doi:10.1039/c9ta01476d), 2019-01-01
Supplement: c9ta01476d1.pdf [file c9ta01476d1.pdf]

## Supporting Information

### Structural Prediction and Multilayer Li<sup>+</sup> Storage in Two Dimensional VC<sub>2</sub> Carbide Studied by First-Principles Calculations

Jing Xu<sup>a,b</sup>, Dashuai Wang<sup>a,\*</sup>, Ruqian Lian<sup>a</sup>, Xinying Gao<sup>a</sup>, Yanhui Liu<sup>b</sup>, Gogotsi Yury<sup>a,c</sup>, Gang Chen<sup>a</sup>, Yingjin Wei<sup>a,\*</sup>

<sup>a</sup>Key Laboratory of Physics and Technology for Advanced Batteries (Ministry of Education), College of Physics, Jilin University, Changchun 130012, China.

<sup>b</sup>Department of Physics, Science of Technology, Yanbian University, Yanji 133000, China.

<sup>c</sup>Department of Materials Science & Engineering, and A. J. Drexel Nanomaterials Institute, Drexel University, Philadelphia, Pennsylvania 19104, United States.

\*Corresponding author: yjwei@jlu.edu.cn (Y.J. Wei), 745752245@qq.com (D.S. Wang), Tel & Fax: 86-431-85155126

**Table S1** Structure parameters of the predicted VC<sub>2</sub> monolayers and stacked multilayer.

|                           | VC <sub>2</sub> - $\alpha$ | VC <sub>2</sub> - $\beta$ | VC <sub>2</sub> -T                              | S-VC <sub>2</sub> |
|---------------------------|----------------------------|---------------------------|-------------------------------------------------|-------------------|
| a (Å)                     | 2.6945                     | 3.2769                    | 2.9646                                          | 3.2855            |
| b (Å)                     | 4.2735                     | 4.6232                    | 2.9646                                          | 4.6349            |
| c (Å)                     | 22.5267                    | 22.1872                   | 22.0696                                         | 11.0738           |
| $\alpha = \beta = \gamma$ | 90°                        | 90°                       | $\alpha = \beta = 90^\circ, \gamma = 120^\circ$ | 90°               |
| V-C (Å)                   | 2.0558/2.1241              | 1.9266/2.1245             | 2.0001                                          | 1.9305/2.1274     |
| C-C (Å)                   | 1.3409                     | 1.3478                    | -                                               | 1.347             |

**Table S2** Adsorption energy ( $E_{ad}$ ) and transferred charges ( $\Delta e$ ) per Li atom at different sites with a  $3 \times 3 \times 1$  VC<sub>2</sub> supercell.

| site | V <sub>18</sub> C <sub>36</sub> Li- $\alpha$ |                | V <sub>18</sub> C <sub>36</sub> Li- $\beta$ |                |
|------|----------------------------------------------|----------------|---------------------------------------------|----------------|
|      | $E_{ad}$ (eV)                                | $\Delta e$ -Li | $E_{ad}$ (eV)                               | $\Delta e$ -Li |
| 1    | -1.2809                                      | -0.9087        | -1.8775                                     | -0.9392        |
| 2    | -1.9523                                      | -0.9168        | -1.2208                                     | -0.9147        |
| 3    | -1.194                                       | -0.9108        | -1.7491                                     | -0.9277        |
| 4    | -1.4245                                      | -0.9092        | -1.6274                                     | -0.9368        |

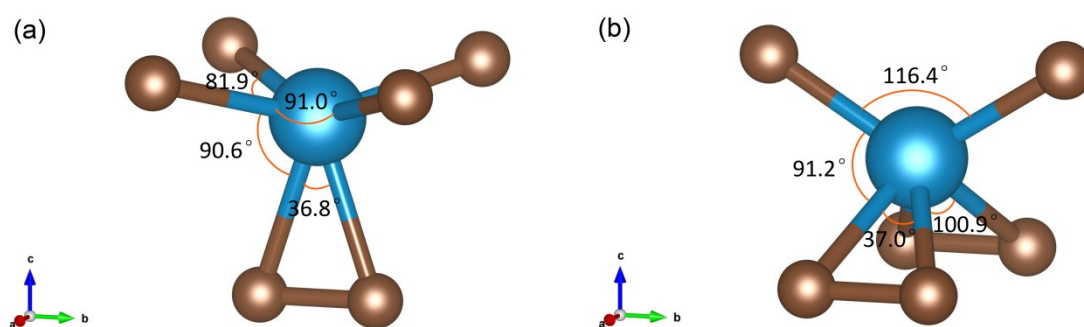

**Fig. S1** Bond angles of C-V-C for (a) VC<sub>2</sub>- $\alpha$  and (b) VC<sub>2</sub>- $\beta$  configurations.

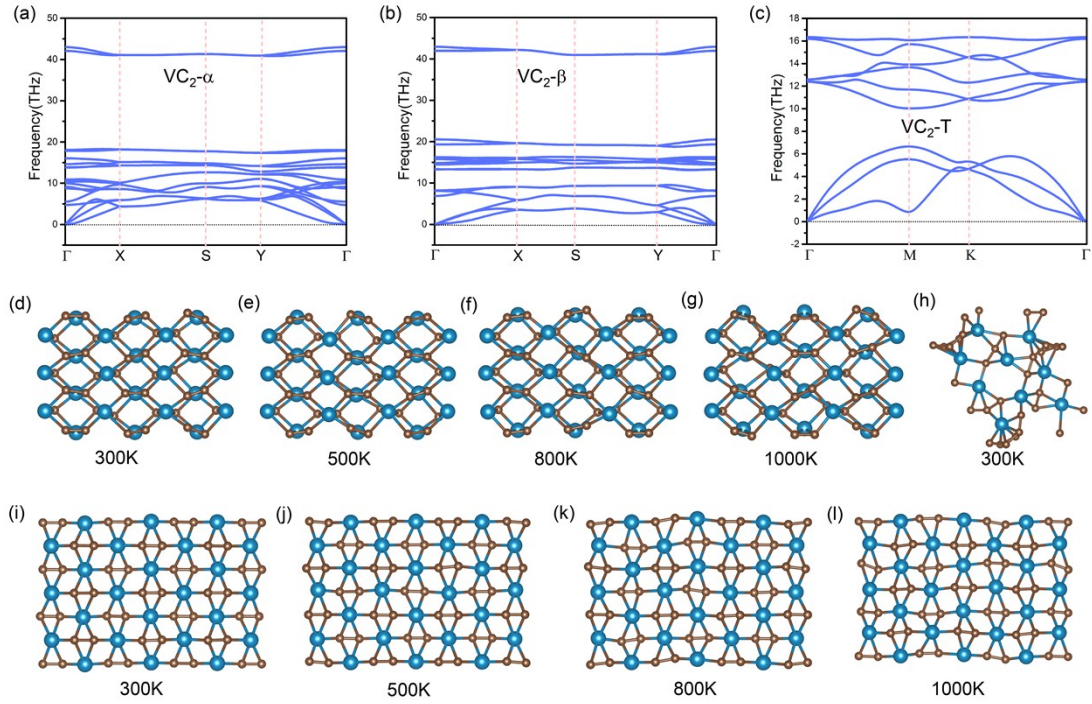

**Fig. S2** Phonon spectra of (a)  $VC_2\text{-}\alpha$ , (b)  $VC_2\text{-}\beta$  and (c)  $VC_2\text{-T}$ . AIMD simulated  $VC_2$  monolayers at 300, 500, 800 and 1000K, (d)-(g) for  $VC_2\text{-}\alpha$ , (h) for  $VC_2\text{-T}$ , and (i)-(l) for  $VC_2\text{-}\beta$ , respectively.

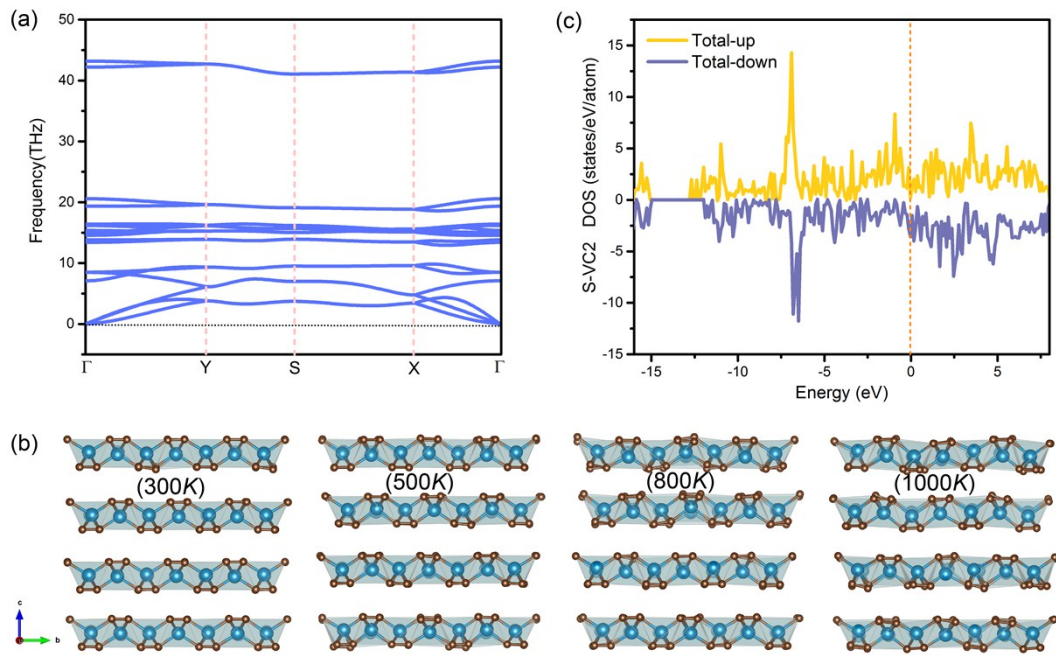

**Fig. S3** (a) phonon spectra, (b) AIMD simulated structures at 300, 500, 800 and 1000K and (c) DOS of  $S\text{-}VC_2$ , respectively.
